# Supplementary material for: Influence of yttrium doping on the nonlinear optical limiting properties of cadmium molybdate nanostructures
Source: Royal Society of Chemistry journal article supplement (doi:10.1039/d2ra04687c), 2022-01-01
Supplement: d2ra04687c1.pdf [file d2ra04687c1.pdf]

### Supplementary data

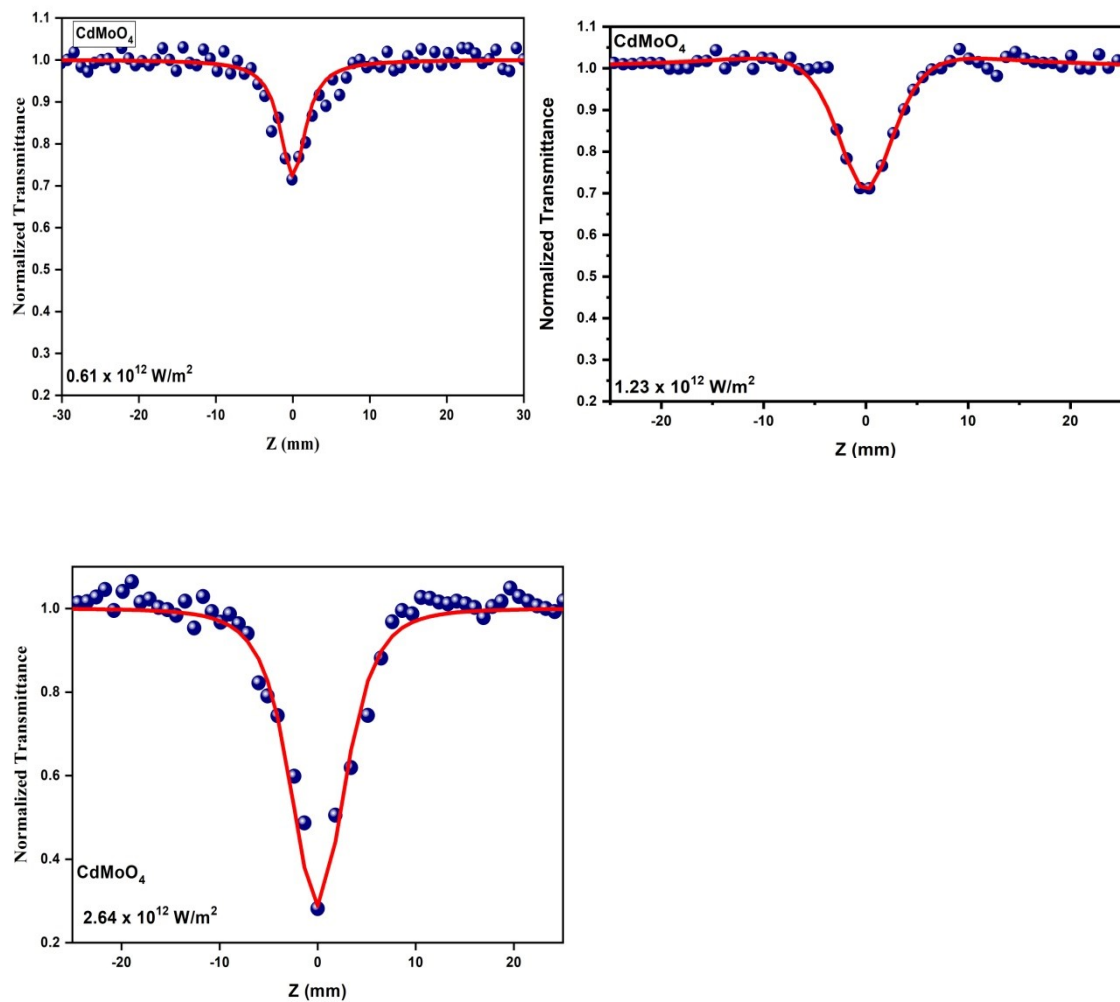

Fig. 1 Intensity dependent open aperture Z-scan graph for pure CdMoO<sub>4</sub> nanostructures

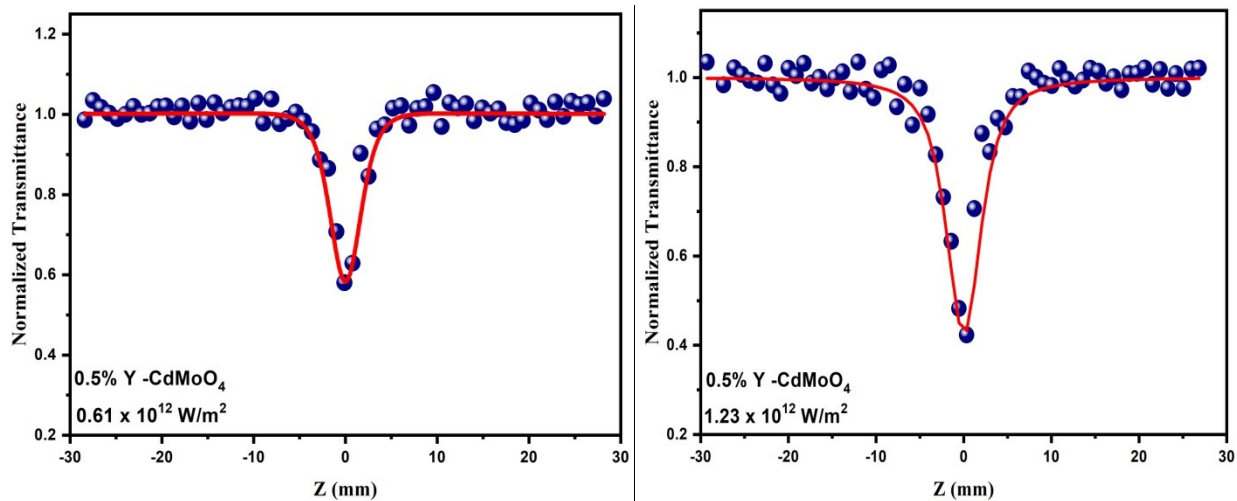

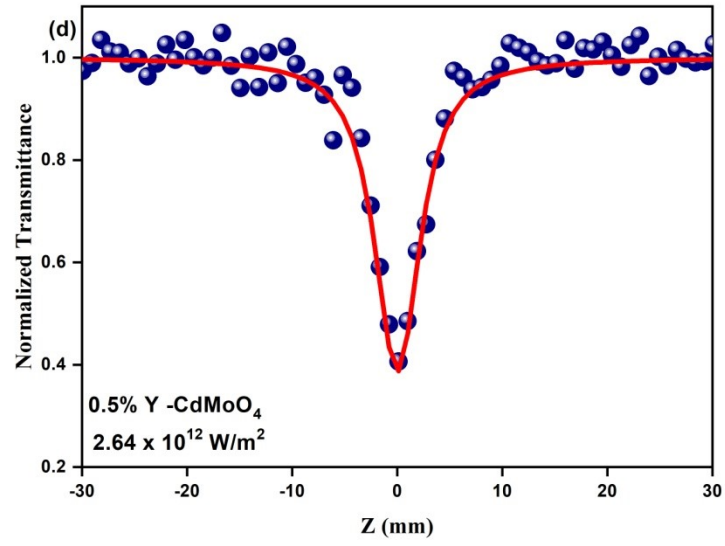

Fig. 2 Intensity dependent open aperture Z-scan graph for 0.5 % Y<sup>3+</sup> doped CdMoO<sub>4</sub> nanostructures
